# Supplementary material
Source: publisher figshare collection journal article supplement (https://frontiersin.figshare.com/ndownloader/files/20733936)
Supplement: Supplementary file 1 [file 20733936]

Mass loss from calving in Himalayan proglacial lakes

Supplementary Table 1. PlanetScope satellite imagery used in this study with respective iceberg areas

| Acquisition Date | Acquisition time (NPT) | Area of icebergs (m2) | Random uncertainty (m2) | Number of icebergs |
| --- | --- | --- | --- | --- |
| 16/04/2017 | 10:59:01 | 0 | - | 0 |
| 19/07/2017 | 10:01:13 | 99887 | 2040 | 135 |
| 30/08/2017 | 10:02:36 | 38671 | 945 | 61 |
| 07/09/2017 | 11:11:55 | 23685 | 970 | 69 |
| 08/09/2017 | 10:02:09 | 26334 | 1479 | 120 |
| 09/09/2017 | 10:02:57 | 32589 | 2005 | 172 |
| 11/09/2017 | 10:01:42 | 30465 | 1098 | 85 |
| 14/09/2017 | 11:09:49 | 29151 | 1596 | 124 |
| 24/09/2017 | 10:03:24 | 21051 | 1274 | 98 |
| 26/09/2017 | 10:04:21 | 19998 | 1245 | 94 |
| 03/10/2017 | 11:08:10 | 18261 | 869 | 57 |
| 05/10/2017 | 11:07:52 | 18180 | 885 | 63 |
| 06/10/2017 | 11:07:30 | 15597 | 821 | 60 |
| 07/10/2017 | 10:03:17 | 13842 | 832 | 63 |
| 09/10/2017 | 10:04:28 | 14319 | 852 | 69 |
| 10/10/2017 | 10:04:00 | 12258 | 618 | 44 |
| 15/10/2017 | 10:05:24 | 13617 | 790 | 58 |
| 17/10/2017 | 10:05:11 | 13302 | 714 | 51 |
| 18/10/2017 | 11:06:08 | 10422 | 768 | 61 |
| 20/10/2017 | 10:02:52 | 8928 | 678 | 58 |
| 22/10/2017 | 10:04:24 | 8730 | 444 | 33 |
| 24/10/2017 | 10:04:13 | 8136 | 499 | 37 |
| 26/10/2017 | 10:04:56 | 6462 | 559 | 49 |
| 27/10/2017 | 10:04:01 | 6012 | 386 | 33 |
| 02/11/2017 | 10:04:45 | 4698 | 368 | 30 |
| 04/11/2017 | 10:05:38 | 4860 | 470 | 39 |
| 06/11/2017 | 10:06:09 | 4572 | 485 | 41 |
| 09/11/2017 | 10:05:21 | 3600 | 483 | 44 |
| 12/11/2017 | 10:04:41 | 4320 | 328 | 27 |
| 15/11/2017 | 10:06:48 | 3384 | 299 | 25 |
| 18/11/2017 | 11:01:07 | 1116 | 109 | 10 |
| 20/11/2017 | 10:04:45 | 1422 | 134 | 12 |
| 21/11/2017 | 10:09:22 | 1989 | 181 | 14 |
| 23/11/2017 | 10:06:48 | 1143 | 138 | 12 |
| 28/11/2017 | 10:06:31 | 747 | 122 | 12 |
| Two additional PlanetScope images (30/06/2017 and 14/07/2019) were used to identify the timing of the first calving event. | | | | |

Supplementary Table 2. ASTER L2 Surface Kinetic Temperature data.

| Lake | Date | Mean lake temperature (°C) | Standard deviation (°C) |
| --- | --- | --- | --- |
| Thulagi | 27/10/2017 | 3.79 | 0.48 |
| 29/09/2015 | 10.58 | 0.28 |
| 06/04/2015 | 1.45 | 0.21 |
| 12/10/2014 | 7.76 | 0.30 |
| 15/03/2013 | 0.94 | 0.20 |
| 07/11/2012 | 5.04 | 0.25 |
| 29/10/2012 | 5.86 | 0.26 |
| 13/10/2012 | 6.93 | 0.33 |
| 03/03/2012 | -1.53 | 0.33 |
| 11/10/2011 | 7.70 | 0.62 |
| 25/04/2008 | 6.85 | 0.25 |
| 21/02/2008 | 0.12 | 0.22 |
| 04/01/2008 | -0.11 | 0.26 |
| 23/04/2007 | 5.01 | 0.44 |
| 01/11/2007 | 6.47 | 0.14 |
| 04/11/2005 | 4.24 | 0.55 |
| 12/02/2005 | -0.87 | 0.22 |
| 26/12/2004 | -1.91 | 0.58 |
| 01/11/2004 | 4.12 | 0.21 |
| 23/10/2004 | 5.00 | 0.31 |
| 17/02/2001 | 0.47 | 0.34 |
| Lower Barun | 02/11/2015 | 3.28 | 0.44 |
| 08/11/2009 | 1.35 | 0.28 |
| 06/01/2008 | -3.25 | 0.33 |
| 21/12/2007 | -0.31 | 0.70 |
| 18/10/2007 | 3.57 | 0.11 |
| 13/11/2005 | 1.72 | 0.48 |
| 09/10/2004 | 4.15 | 0.33 |
| 23/10/2003 | 3.53 | 0.42 |
| 21/11/2002 | 0.90 | 0.05 |
| 20/12/2001 | -3.48 | 0.65 |
| 10/10/2001 | 3.95 | 0.10 |
| 24/04/2001 | 2.06 | 0.75 |
| 17/04/2001 | 1.05 | 0.32 |
| 24/11/2000 | 0.86 | 0.45 |
| Imja | 26/10/2016 | 4.61 | 0.43 |
| 22/11/2014 | -0.84 | 0.36 |
| 28/04/2014 | 2.30 | 0.05 |
| 17/03/2008 | -0.90 | 0.38 |
| 06/01/2008 | -4.55 | 0.45 |
| 01/02/2006 | -3.00 | 0.36 |
| 23/01/2006 | -5.82 | 0.24 |
| 15/12/2005 | -3.76 | 0.33 |
| 29/11/2005 | -1.80 | 0.39 |
| 13/11/2005 | 1.02 | 0.31 |
| 10/11/2004 | 3.28 | 0.83 |
| 09/10/2004 | 8.58 | 0.44 |
| 23/10/2003 | 5.54 | 0.15 |
| 21/11/2002 | 1.08 | 0.21 |
| 20/12/2001 | -4.11 | 0.64 |
| 24/04/2001 | 1.40 | 0.26 |
| 21/04/2001 | 1.47 | 0.29 |


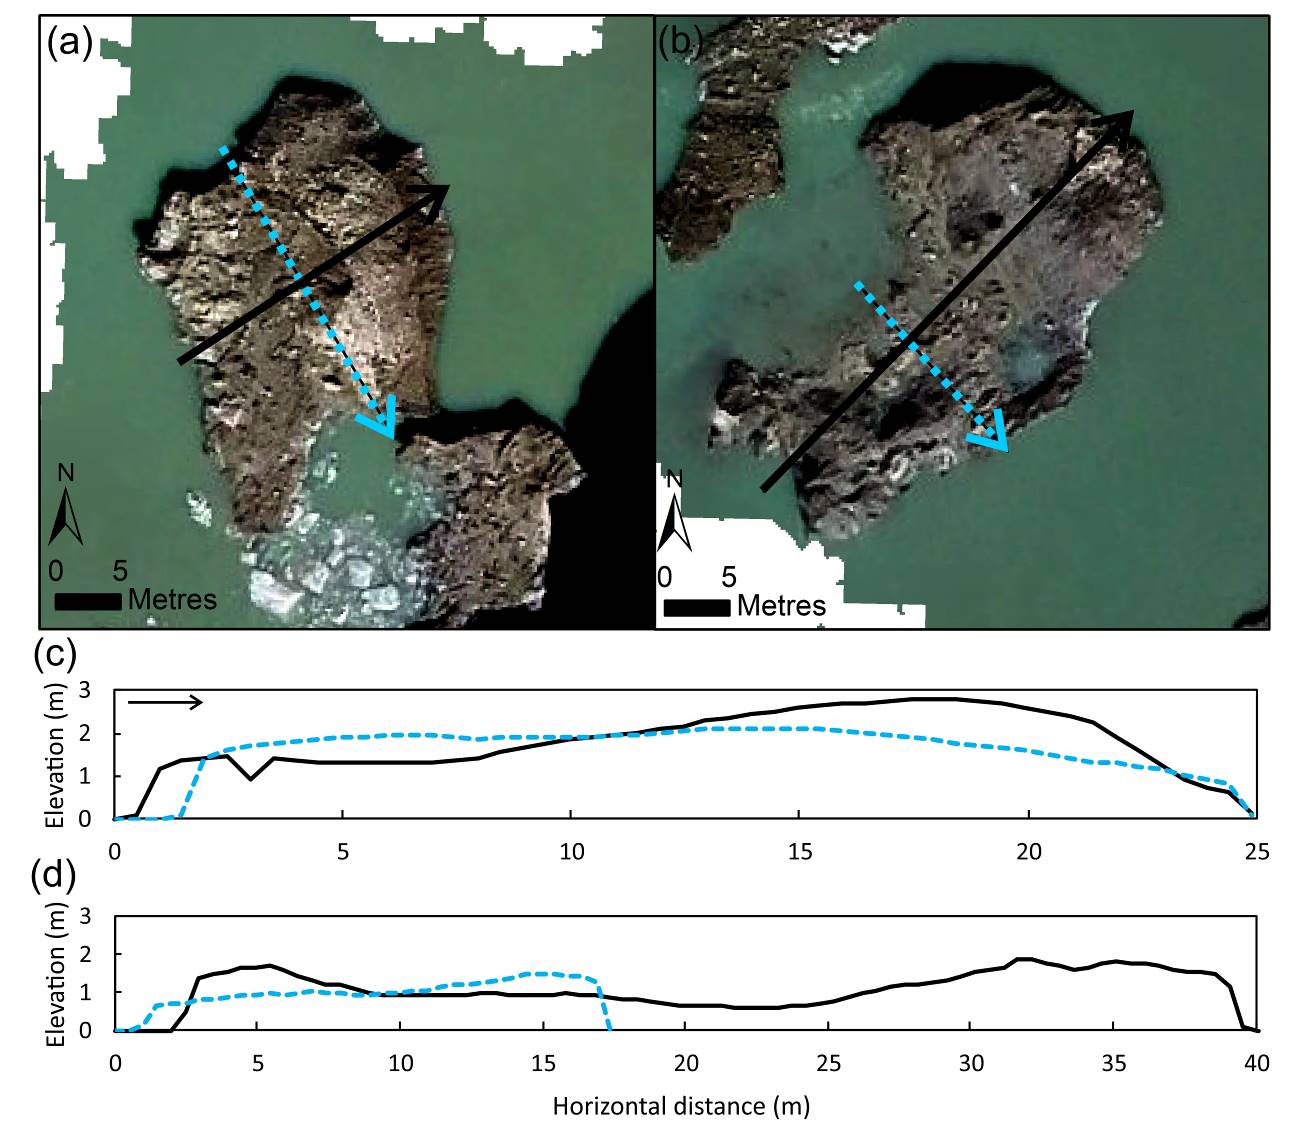


Supplementary Figure 1. Two example icebergs (a) and (b). The above-water profile for (a) is shown in panel (c), and the profile for (b) is shown in panel (d). The profiles were derived from the UAV SfM orthophoto and digital elevation model.


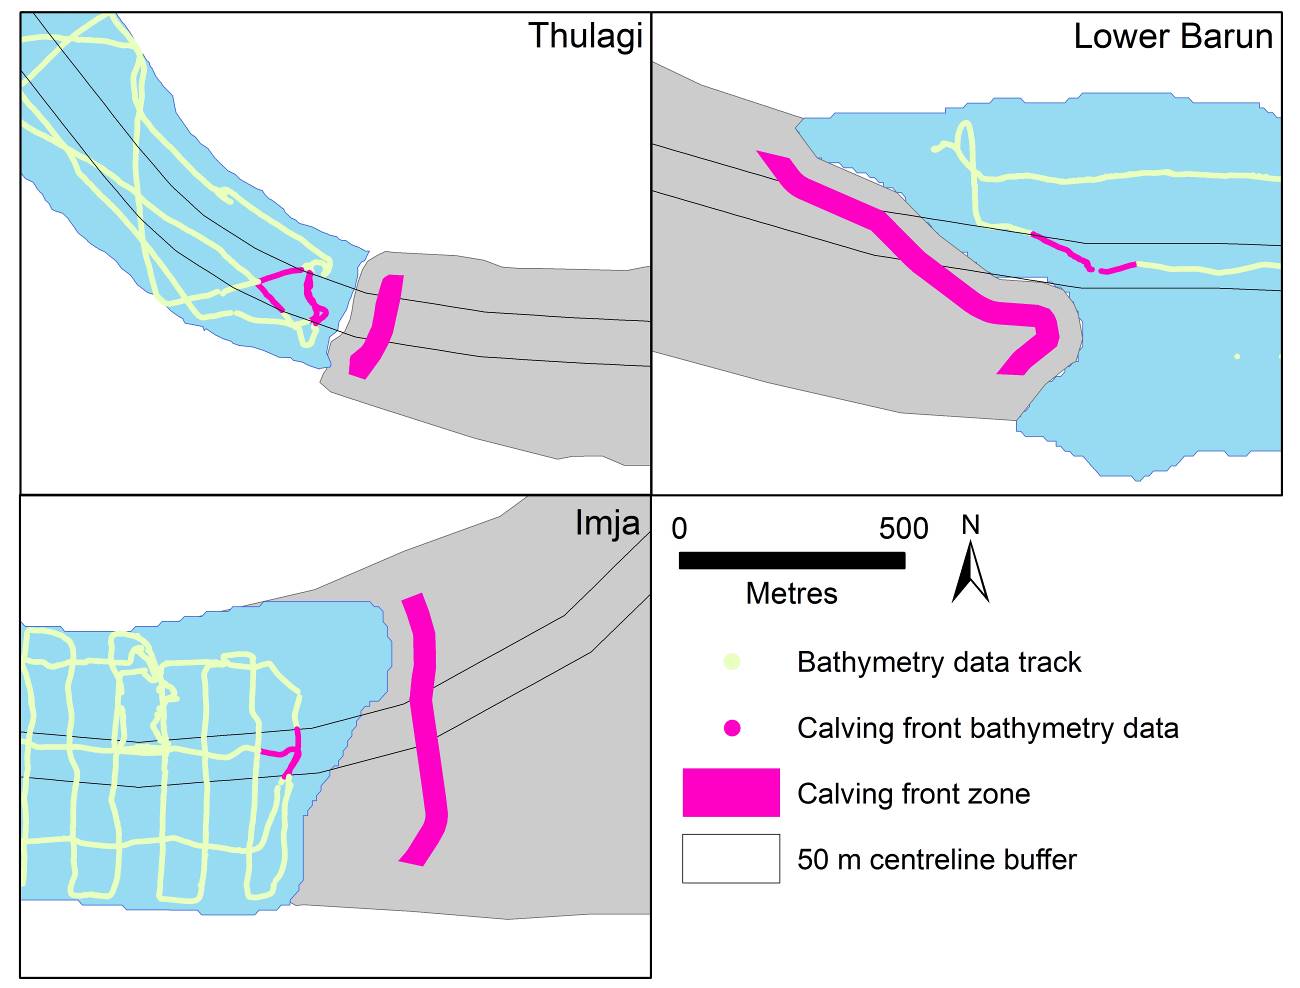


Supplementary Figure 2. Glacier calving front and lake zones used to derive the data in Table 4.


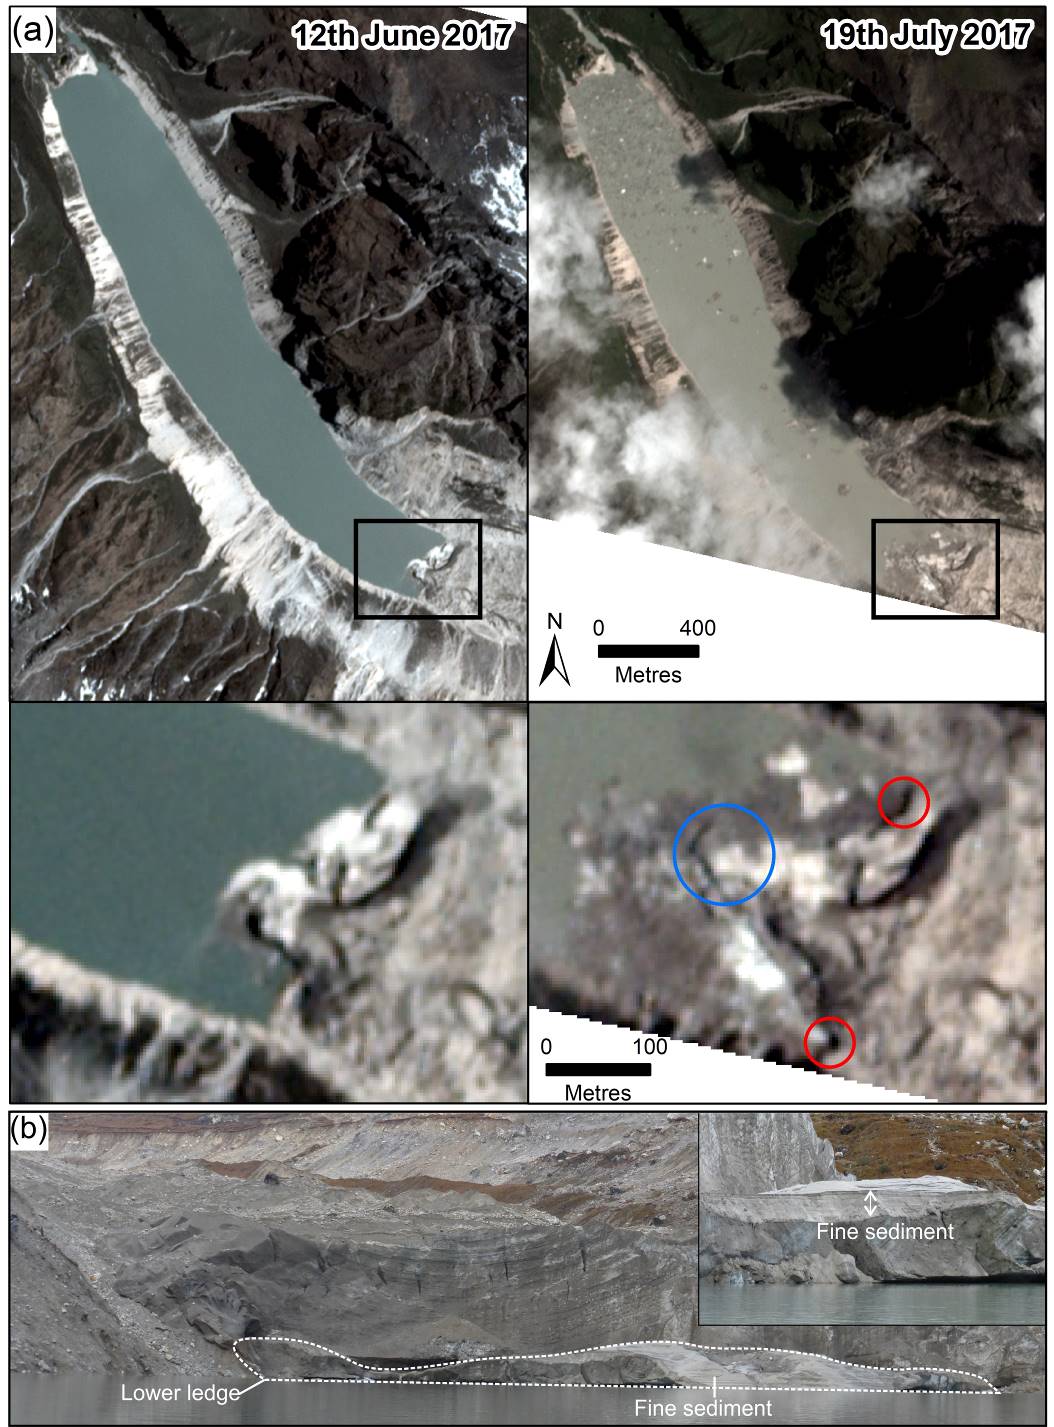


Supplementary Figure 3. (a) PlanetScope images showing iceberg production in Thulagi Lake with no apparent subaerial glacier calving. Red circles indicate ice loss and the blue circle indicates ice appearance. (b) A sediment covered ice ledge present in front of the calving face on 28 September 2013.


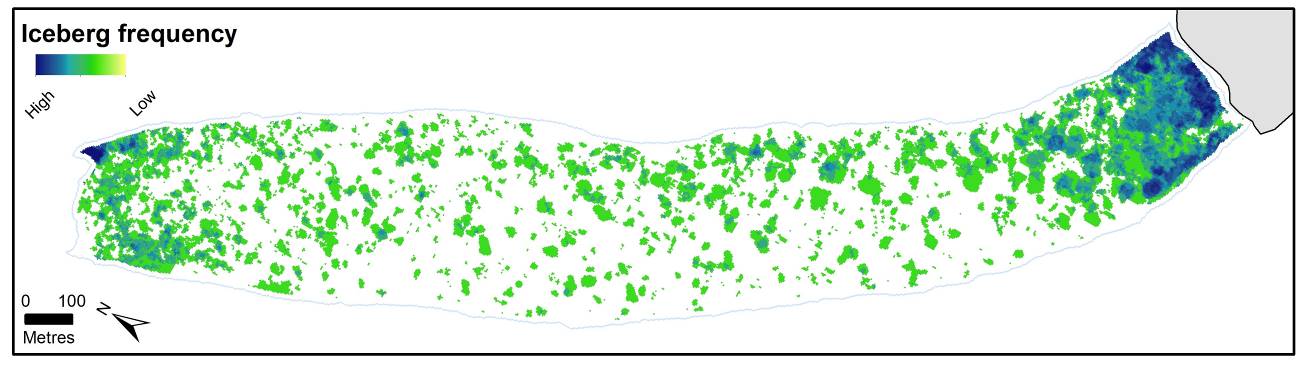


Supplementary Figure 4. Spatial distribution of icebergs corresponding to Figure. 3d (main text) (compiled over all images from 19 July 2017 to 28November 2017).


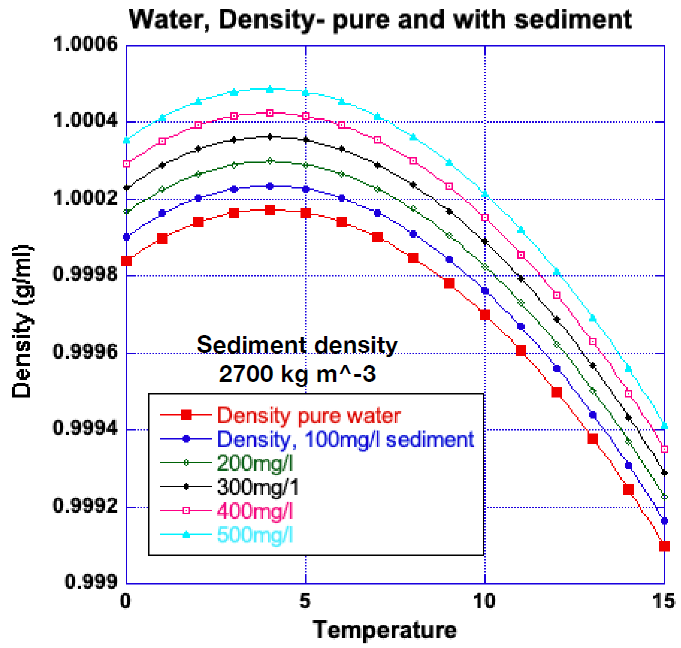


Supplementary Figure 5. Temperature-dependent density of pure liquid water and of water containing suspended sediment.


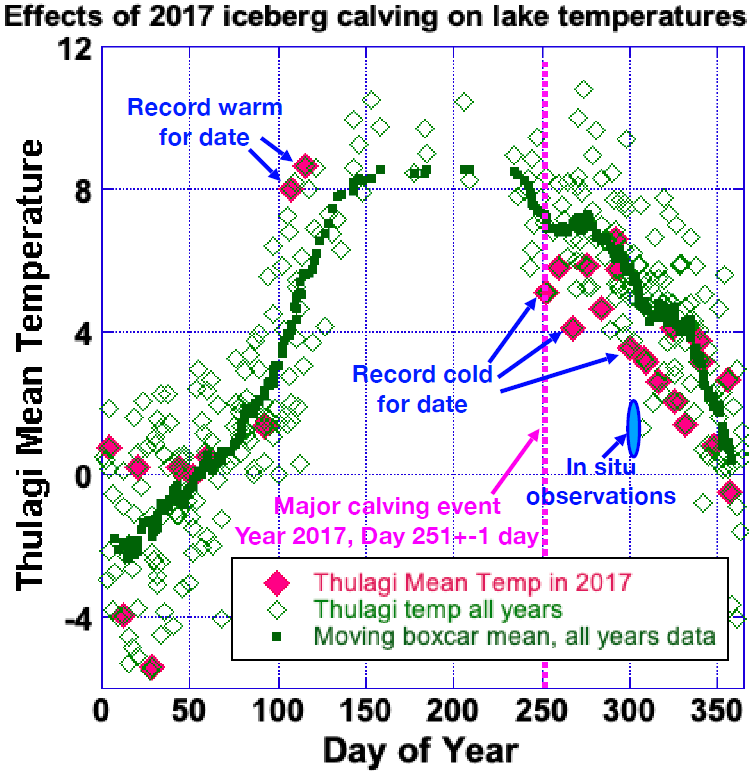


Supplementary Figure 6. Thermal influence of iceberg calving at Thulagi Lake. A calving event occurred between 7-9 September 2017 (magenta dashed line). The 2017 thermal record (red solid diamonds) compared to all-years data (green open diamonds and the moving average in dark green) suggests that lake temperatures were influenced by the calved ice. Despite being a year that started average to record-warm for date, Sep-Nov 2017 was much colder than average— the coldest on record for date for some measurements over the next 80 days, which was also the period of iceberg melting. By December, lake temperatures returned to normal.


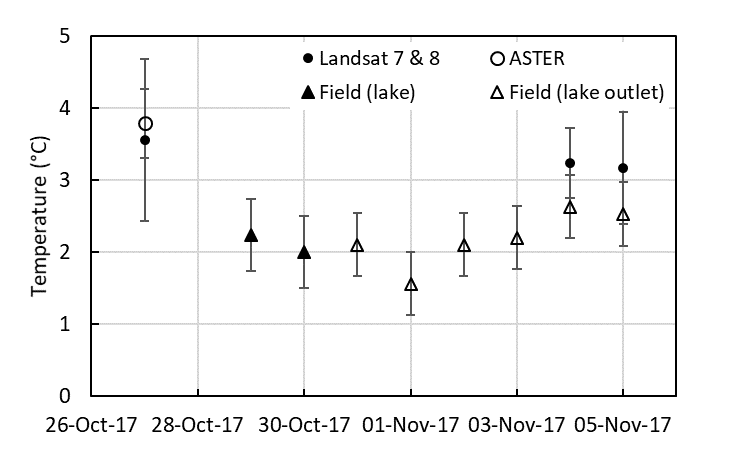


Supplementary Figure 7. Comparison of satellite- and field-derived water temperatures for Thulagi Lake. Coincident measurements between satellite data and field data at ~10:30 NPT on 4th and 5th November 2017 show a mean difference of 0.62°C.


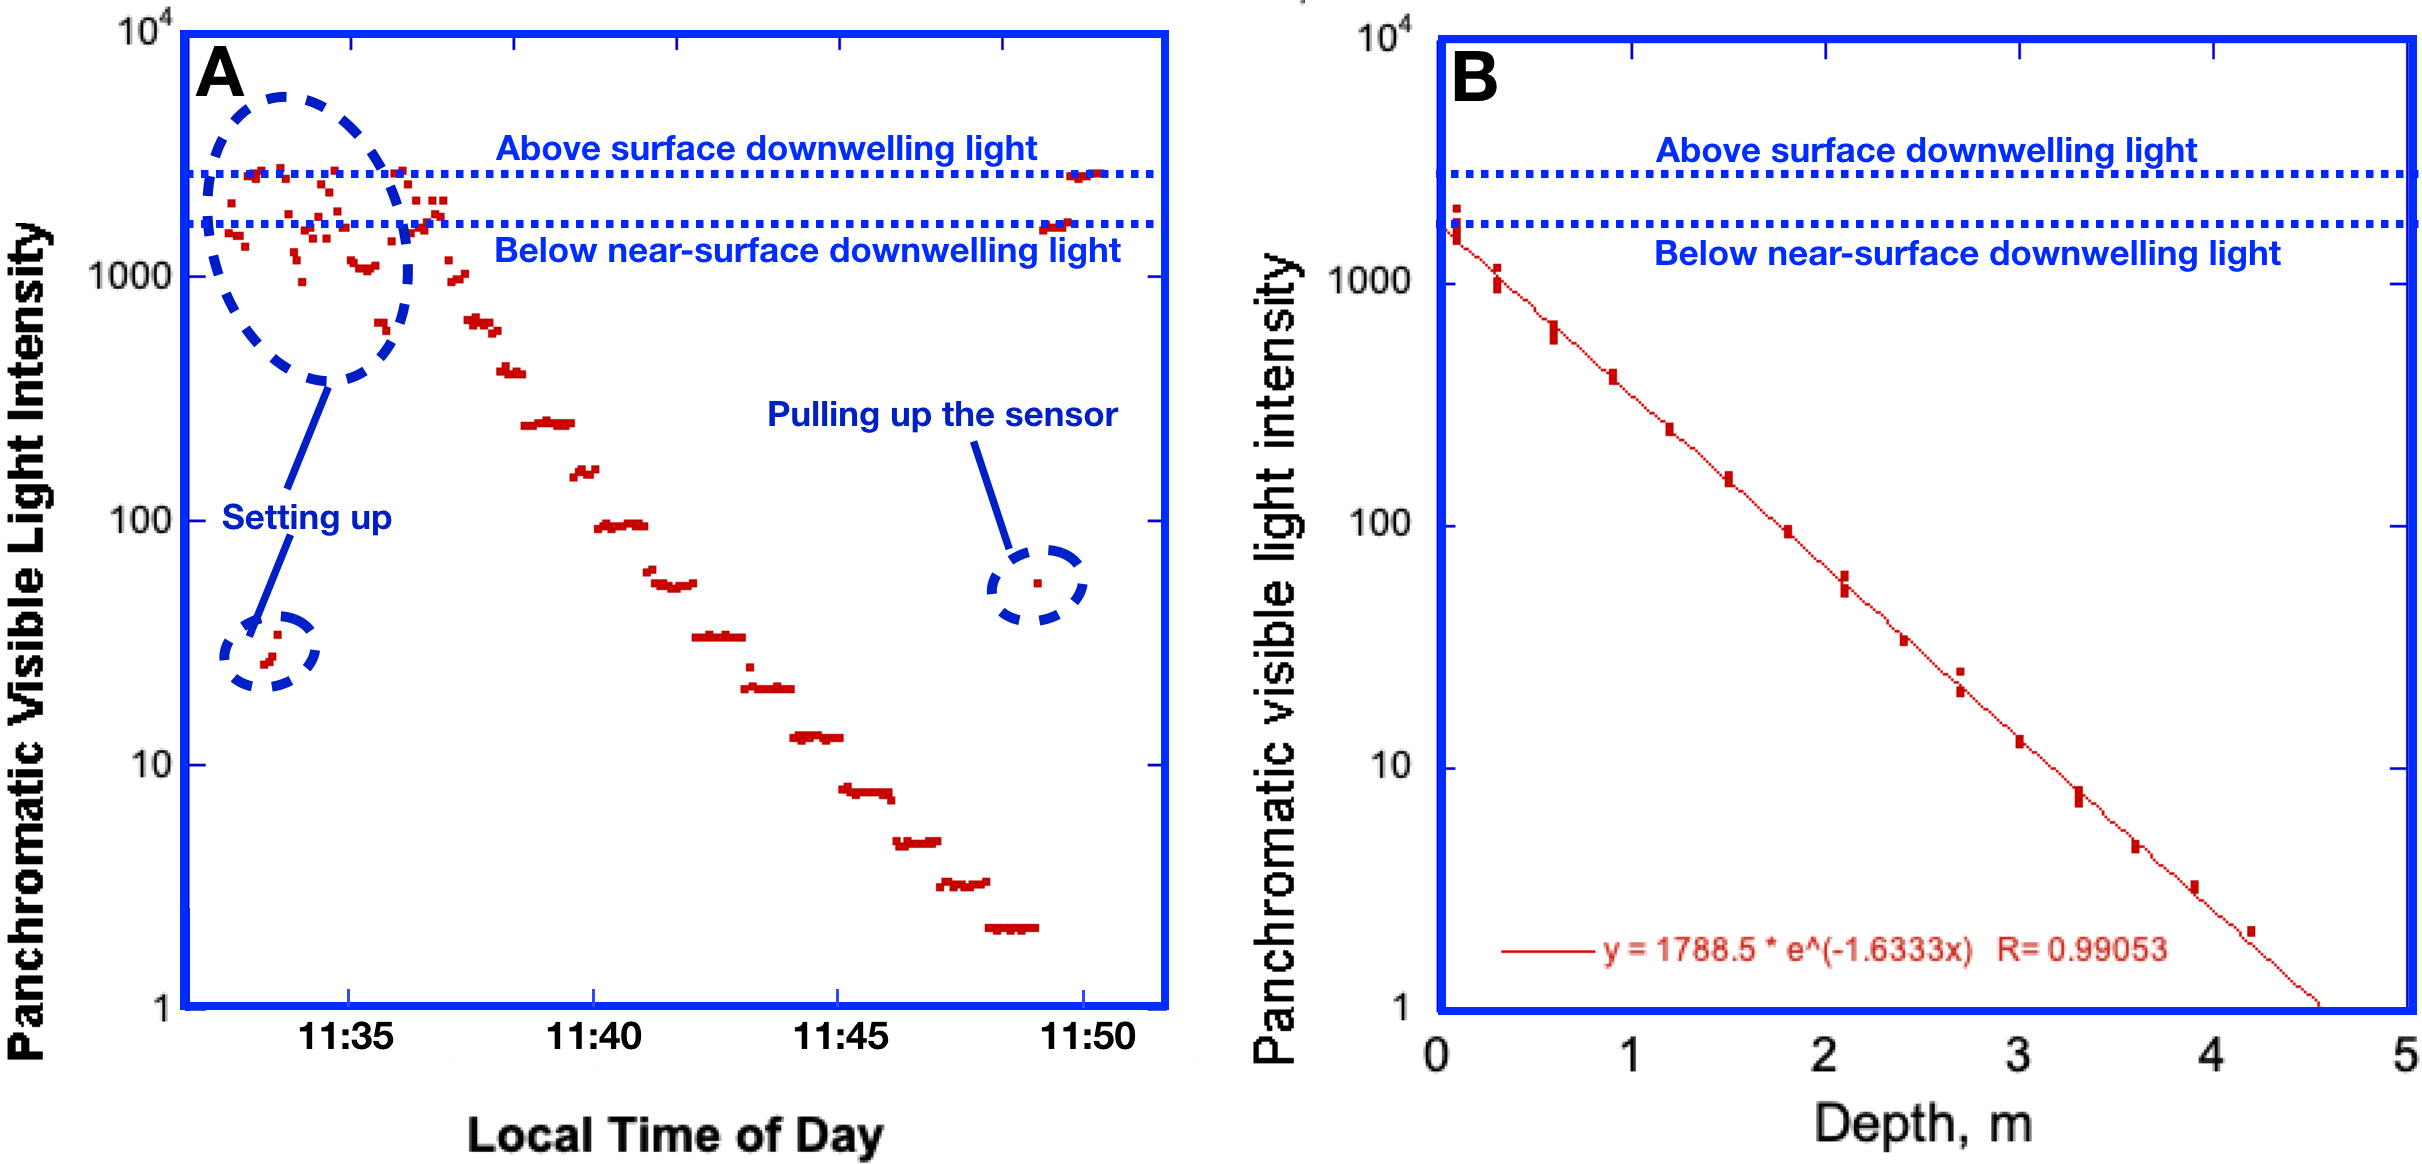


Supplementary Figure 8. Light intensity (visible panchromatic, 400-700 nm) versus local Nepal time of measurements (a), and reconstructed depth (b) for our measured “profile C” in Thulagi Lake, October 28, 2018, close to the deployed thermistor string. Y axis values are in micro-Einsteins per square meter per second; divide Y axis values by 5 to get Watts per square meter. The extinction of light intensity, according to the equation in panel B, is 0.805 per meter for the sun at the angle it was at the time and date of measurement (53.8 degrees zenith angle). When corrected to a sun at zenith, the extinction is a factor of 2 per 71 cm of depth increment.
